# Supplementary material
Source: PubMed Central journal article supplement (PMC7126489)
Supplement: mmc1.pdf [file mmc1.pdf]

## Appendix A. Supplementary data

The titration results in serial 10-fold dilutions of the stock virus are summarized in Table 1. The titer per 100  $\mu$ l is in the unit of antilog scale of virus particles, which is converted to the actual number concentration of virus particles

Table 1 Titration result for serial 10-fold dilutions of FCV, TGEV, and SIV

| Virus    | Dilution  | Titer                     |                     |
|----------|-----------|---------------------------|---------------------|
|          |           | Per 100 $\mu$ l (antilog) | Per 1ml (particles) |
| FCV      | Undiluted | 6.5                       | $3.16 \times 10^7$  |
|          | 1:10      | 5.5                       | $3.16 \times 10^6$  |
|          | 1:100     | 4.25                      | $1.77 \times 10^5$  |
|          | 1:1000    | 2.75                      | $5.62 \times 10^3$  |
|          | 1:10,000  | 2.0                       | $1 \times 10^3$     |
| TGEV     | Undiluted | 4.75                      | $5.62 \times 10^5$  |
|          | 1:10      | 3.75                      | $5.62 \times 10^4$  |
|          | 1:100     | 3                         | $1 \times 10^4$     |
|          | 1:1000    | 2.25                      | $1.77 \times 10^3$  |
|          | 1:10,000  | 1.25                      | $1.77 \times 10^2$  |
| SIV H1N1 | Undiluted | 4.25                      | $1.77 \times 10^5$  |
|          | 1:10      | 3.25                      | $1.77 \times 10^4$  |
|          | 1:100     | 2.5                       | $3.16 \times 10^3$  |
|          | 1:1000    | 1.25                      | $1.77 \times 10^2$  |
|          | 1:10,000  | 0.5                       | $3.16 \times 10^1$  |
